# Supplementary material for: A Meta-Analysis of the Effects of Teacher Professional Development in STEM Education: What Have We Done, and Where Are We Going?
Source: Research Square preprint supplement (doi:10.21203/rs.3.rs-6602739/v1), 2025-06-04
Supplement: Supplementary file 1 [file 03dd36b18988eb126fefc9b1.docx]

**Table 2**

*Results of Meta-regression with Characteristics of Funding Status and Country*

| Moderators | *k* | *ES* | Mean ES | *S.E.* | 95% *C.I.* | | Meta-regression |
| --- | --- | --- | --- | --- | --- | --- | --- |
| *Lower* | *Upper* |
| **Funding** |  |  |  |  |  |  |  |
| No | 28 | 210 | 0.815*** | 0.107 | 0.595 | 1.035 | ns |
| Yes | 90 | 728 | 0.714*** | 0.060 | 0.595 | 0.832 |
| **Country** |  |  |  |  |  |  |  |
| US | 95 | 715 | 0.729*** | 0.057 | 0.616 | 0.842 | ns |
| Other | 23 | 223 | 0.771*** | 0.130 | 0.501 | 1.042 |

*Note*. *k* = number of studies, *ES* = number of effect sizes, Mean ES = pooled effect size, *S.E.* = standard errors, and 95% *C.I.* = 95% confidence interval. *** *p* < .001, ** *p* < .01, * *p* < .05.
