# Supplementary material for: A Meta-Analysis of the Effects of Teacher Professional Development in STEM Education: What Have We Done, and Where Are We Going?
Source: Research Square preprint supplement (doi:10.21203/rs.3.rs-6602739/v1), 2025-06-04
Supplement: Supplementary file 2 [file 08100b48ec89de31306b8ab1.docx]

**Table 4**

*Results of Meta-regression with PD Program Characteristics*

| Moderators | *k* | *ES* | Mean ES | *S.E.* | 95% *C.I.* | | Meta-regression |
| --- | --- | --- | --- | --- | --- | --- | --- |
| *Lower* | *Upper* |
| **Technology** |  |  |  |  |  |  |  |
| No | 80 | 614 | 0.750*** | 0.062 | 0.627 | 0.873 | ns |
| Yes | 39 | 324 | 0.738*** | 0.100 | 0.536 | 0.940 |
| **Subject** |  |  |  |  |  |  |  |
| Science | 66 | 517 | 0.762*** | 0.065 | 0.632 | 0.892 | ns |
| Math | 17 | 108 | 0.572*** | 0.136 | 0.284 | 0.860 |
| Technology | 10 | 44 | 0.763* | 0.284 | 0.120 | 1.405 |
| > 2 subjects | 26 | 269 | 0.728*** | 0.099 | 0.523 | 0.932 |
| **Dosage (Hours)** |  |  |  |  |  |  |  |
| 80 | 32 | 247 | 0.773*** | 0.110 | 0.549 | 0.998 | *t*(24.60) = 1.91+ |
| 81 | 13 | 132 | 1.121*** | 0.182 | 0.724 | 1.517 |
| **Duration (Months)** |  |  |  |  |  |  |  |
| 6 | 42 | 345 | 0.705*** | 0.082 | 0.540 | 0.869 | ns |
| 7-12 | 37 | 262 | 0.691*** | 0.083 | 0.523 | 0.860 |
| 13-23 | 6 | 64 | 0.781* | 0.214 | 0.232 | 1.330 |
| 24 | 29 | 211 | 0.830*** | 0.133 | 0.557 | 1.104 |

*Note*. *k* = number of studies, *ES* = number of effect sizes, Mean ES = pooled effect size, *S.E.* = standard errors, and 95% *C.I.* = 95% confidence interval. *** *p* < .001, ** *p* < .01, * *p* < .05, + *p* < .10.
