# Supplementary material for: A Meta-Analysis of the Effects of Teacher Professional Development in STEM Education: What Have We Done, and Where Are We Going?
Source: Research Square preprint supplement (doi:10.21203/rs.3.rs-6602739/v1), 2025-06-04
Supplement: Supplementary file 3 [file 40cd62042aa93231d735dc54.docx]

**Table 3**

*Results of Meta-regression with Grade Level*

| Moderators | *k* | *ES* | Mean ES | *S.E.* | 95% *C.I.* | | Meta-regression |
| --- | --- | --- | --- | --- | --- | --- | --- |
| *Lower* | *Upper* |
| K-E (0) | 37 | 261 | 0.779*** | 0.107 | 0.562 | 0.996 | (2) vs. (4)  *t*(10.05) = 2.03*  (3) vs. (4)  *t*(12.76) = 1.86* |
| Middle (1) | 26 | 250 | 0.856*** | 0.108 | 0.633 | 1.078 |
| High (2) | 15 | 88 | 0.832*** | 0.130 | 0.551 | 1.113 |
| K-M (3) | 8 | 72 | 0.423** | 0.153 | 0.061 | 0.784 |
| M-H (4) | 13 | 100 | 0.585** | 0.152 | 0.253 | 0.917 |
| K-12 (5) | 18 | 155 | 0.576*** | 0.104 | 0.356 | 0.795 |

*Note*. *k* = number of studies, *ES* = number of effect sizes, Mean ES = pooled effect size, *S.E.* = standard errors, and 95% *C.I.* = 95% confidence interval. *** *p* < .001, ** *p* < .01, * *p* < .05, + *p* < .10.
