# Supplementary material for: A Meta-Analysis of the Effects of Teacher Professional Development in STEM Education: What Have We Done, and Where Are We Going?
Source: Research Square preprint supplement (doi:10.21203/rs.3.rs-6602739/v1), 2025-06-04
Supplement: Supplementary file 4 [file 4f6186b573152661074d0c88.docx]

**Table 1**

*Results of Meta-regression with Characteristics of Outcomes*

| Moderators | *k* | *ES* | Mean ES | *S.E.* | 95% *C.I.* | | Meta-regression |
| --- | --- | --- | --- | --- | --- | --- | --- |
| *Lower* | *Upper* |
| **Target Sample** |  |  |  |  |  |  |  |
| Student | 41 | 262 | 0.771*** | 0.095 | 0.578 | 0.963 | ns |
| Teacher | 89 | 676 | 0.705*** | 0.059 | 0.588 | 0.822 |
| **Types of Outcomes** |  |  |  |  |  |  |  |
| Cognitive | 68 | 417 | 0.788*** | 0.063 | 0.663 | 0.913 | ns |
| Affective | 68 | 521 | 0.696*** | 0.081 | 0.534 | 0.858 |

*Note*. *k* = number of studies, *ES* = number of effect sizes, Mean ES = pooled effect size, *S.E.* = standard errors, and 95% *C.I.* = 95% confidence interval. *** *p* < .001, ** *p* < .01, * *p* < .05.
