# Supplementary material for: A Meta-Analysis of the Effects of Teacher Professional Development in STEM Education: What Have We Done, and Where Are We Going?
Source: Research Square preprint supplement (doi:10.21203/rs.3.rs-6602739/v1), 2025-06-04
Supplement: Supplementary file 5 [file 94119b8c811f68266985711c.docx]

**Table 5**

*Results of Meta-regression With Core PD Characteristics*

| Moderators | *k* | *ES* | *Mean ES* | *s.e.* | 95% *C.I.* | | Meta-regression |
| --- | --- | --- | --- | --- | --- | --- | --- |
| *Lower* | *Upper* |
| **Active learning** |  |  |  |  |  |  |  |
| No | 16 | 90 | 0.596*** | 0.172 | 0.229 | 0.963 | ns |
| Yes | 102 | 848 | 0.756*** | 0.054 | 0.647 | 0.864 |
| **Content focus** |  |  |  |  |  |  |  |
| No | 31 | 248 | 0.872*** | 0.111 | 0.645 | 1.099 | ns |
| Yes | 88 | 690 | 0.704*** | 0.059 | 0.587 | 0.821 |
| **Collective participation** |  |  |  |  |  |  |  |
| No | 96 | 751 | 0.726*** | 0.060 | 0.607 | 0.845 | ns |
| Yes | 22 | 187 | 0.771*** | 0.107 | 0.548 | 0.994 |
| **Expert support** |  |  |  |  |  |  |  |
| No | 36 | 282 | 0.742*** | 0.083 | 0.574 | 0.909 | ns |
| Yes | 83 | 656 | 0.746*** | 0.066 | 0.614 | 0.877 |
| **Feedback** |  |  |  |  |  |  |  |
| No | 24 | 215 | 0.735*** | 0.113 | 0.501 | 0.969 | ns |
| Yes | 94 | 723 | 0.737*** | 0.060 | 0.618 | 0.855 |
| **Using models** |  |  |  |  |  |  |  |
| No | 22 | 158 | 0.924*** | 0.128 | 0.657 | 1.191 | ns |
| Yes | 97 | 780 | 0.703*** | 0.057 | 0.590 | 0.816 |
| **Coherence** |  |  |  |  |  |  |  |
| No | 37 | 218 | 0.870*** | 0.101 | 0.664 | 1.075 | ns |
| Yes | 81 | 720 | 0.673*** | 0.059 | 0.556 | 0.790 |

*Note*. *k* = number of studies, *ES* = number of effect sizes, Mean ES = pooled effect size, *S.E.* = standard errors, and 95% *C.I.* = 95% confidence interval. *** *p* < .001, ** *p* < .01, * *p* < .05, + *p* < .10.
