# Supplementary material for: A Meta-Analysis of the Effects of Teacher Professional Development in STEM Education: What Have We Done, and Where Are We Going?
Source: Research Square preprint supplement (doi:10.21203/rs.3.rs-6602739/v1), 2025-06-04
Supplement: Supplementary file 6 [file f94a2b8e376f509f6ab4c54e.docx]

Appendix A

*The Coding Scheme*

| Dimension | Moderator | Description | Type |
| --- | --- | --- | --- |
| Context | Target Sample | Study sample in PD | 0 Teacher |
|  | 1 Student |
| Subject | STEM Subjects Targeted in PD | 0 Science |
|  |  | 1 Math |
|  |  | 2 Technology |
|  |  | 3 Greater than two subjects |
| Funding | Whether the PD program is funded or not | 0 non-Funded |
|  | 1 Funded |
| Country | Country where the PD was implemented. | 0 US |
|  | 1 Other |
| Grade | Grade level that the teacher is teaching or the grade level of the students. | 0 Kindergarten-Elementary |
|  | 1 Middle |
|  | 2 High |
|  | 3 Kindergarten -Middle |
|  | 4 Middle - High |
|  | 5 K-12 |
| Technology Use | PD incorporated technology | 0 No |
| 1 Yes |
| Dosage (hrs) | Total number of PD contact hours | 0 Less than 80 hours |
| 1 Greater than 81 hours |
| Duration (mo) | Time span over which PD was conducted | 0 Less than 6 months |
| 1 7-12 months |
| 2 13-24 months |
| 3 Greater than 24 months |
| Process | Active Learning | The PD program is focused on specific content. It targets particular subjects or topics, such as mathematics, science, literacy, etc., and aims to deepen participants' understanding of this content. | 0 No |
|  | 1 Yes |
| Content Focused | The PD program is not focused on specific content. It may address general teaching strategies or pedagogical approaches without emphasizing particular subject matter. | 0 No |
|  | 1 Yes |
| Collective Participation | The PD program involves collective participation. It encourages group activities, peer learning, and collaboration among participants, promoting a sense of community and shared goals. | 0 No |
|  | 1 Yes |
| Expert Support | The PD program includes support from experts. This means participants receive guidance, mentorship, or direct instruction from individuals with specialized expertise or advanced knowledge in the subject matter or pedagogical practices. | 0 No |
|  | 1 Yes |
| Feedback | PD program providing feedback for teachers. This includes offering participants regular, specific, and constructive feedback on their performance, understanding, and application of the material covered in the on their progress or performance. | 0 No |
|  | 1 Yes |
| Using Models | PD program using models for instruction. This may include demonstrations, exemplars, or simulations of effective practices, strategies, or concepts to illustrate how they can be applied in real-world scenarios.  Alignment and relevance of the PD activities with teachers' existing knowledge, experiences, needs, and standards/curriculum. | 0 No |
|  | 1 Yes |
| Coherence | 0 No |
|  |  | 1 Yes |
| Outcome | PD outcome | The PD program focuses on enhancing knowledge acquisition and cognitive processing, including the development of critical thinking skills, problem-solving abilities, and the application of new knowledge. | 0 Cognitive |
|  |  | The PD program aim to enhance affective outcomes by fostering positive attitudes, increasing motivation and interests, promoting a growth mindset among teachers. | 1 Affective |
